# Supplementary material for: Highly selective oxidation of cyclohexene to 2-cyclohexene-1-one in water using molecular oxygen over Fe–Co–g-C3N4
Source: Royal Society of Chemistry journal article supplement (doi:10.1039/c5cy01177a), 2015-09-11
Supplement: c5cy01177a1.pdf [file c5cy01177a1.pdf]

## Highly selective oxidation of cyclohexene to 2-cyclohexene-1-one in water using molecular oxygen over Fe-Co-g-C<sub>3</sub>N<sub>4</sub>

Dexin Yang, Tao Jiang, Tianbin Wu\*, Peng Zhang, Hongling Han and Buxing Han\*

Beijing National Laboratory for Molecular Sciences, CAS Key Laboratory of Colloid and Interface and Thermodynamics, Institute of Chemistry, Chinese Academy of Sciences.

\* To whom correspondence should be addressed. Email: wtb@iccas.ac.cn, hanbx@iccas.ac.cn

### 1. Experimental

**Synthesis of different catalysts by conventional impregnation method:** In a typical preparation, 0.4 g of pristine g-C<sub>3</sub>N<sub>4</sub> mixed with 10 mL of deionized water was stirred and heated at 80°C in an oil bath. Next, 0.2 g of the metal precursors, FeCl<sub>3</sub> and Co(NO<sub>3</sub>)<sub>2</sub>·6H<sub>2</sub>O, were added and the molar ratio of FeCl<sub>3</sub> to Co(NO<sub>3</sub>)<sub>2</sub>·6H<sub>2</sub>O was 5. The mixed solution was continually heated at 100°C until removal of water. The resulting solid was then heated to 300°C at a rate of 3°C·min<sup>-1</sup> and kept at this temperature for 3 h. Finally, the powder was obtained after cooling to room temperature. The obtained catalyst was denoted as Fe-Co/g-C<sub>3</sub>N<sub>4</sub>. Similarly, Fe/g-C<sub>3</sub>N<sub>4</sub> or Co/g-C<sub>3</sub>N<sub>4</sub> catalysts were prepared according to the same method as Fe-Co/g-C<sub>3</sub>N<sub>4</sub> catalyst except that 0.2 g of FeCl<sub>3</sub> or Co(NO<sub>3</sub>)<sub>2</sub>·6H<sub>2</sub>O was added separately.

### 2. Results

Table S1. Catalytic activity of g-C<sub>3</sub>N<sub>4</sub> doped with various metals for the oxidation of cyclohexene<sup>[a]</sup>

| Entry | Catalysts                             | Conversion (%) | Selectivity (%)                                                                     |                                                                                     |                                                                                       |        |
|-------|---------------------------------------|----------------|-------------------------------------------------------------------------------------|-------------------------------------------------------------------------------------|---------------------------------------------------------------------------------------|--------|
|       |                                       |                |  |  |  | Others |
| 1     | Fe/g-C <sub>3</sub> N <sub>4</sub>    | 7.2            | 72.5                                                                                | 9.4                                                                                 | 14.2                                                                                  | 3.9    |
| 2     | Co/g-C <sub>3</sub> N <sub>4</sub>    | 33.74          | 66.1                                                                                | 26.1                                                                                | 6.1                                                                                   | 1.7    |
| 3     | Fe-Co/g-C <sub>3</sub> N <sub>4</sub> | 13.8           | 68.0                                                                                | 22.0                                                                                | 9.3                                                                                   | 0.7    |
| 4     | Fe-Co-g-C <sub>3</sub> N <sub>4</sub> | 21.8           | 95.5                                                                                | 1.2                                                                                 | 1.9                                                                                   | 1.4    |

[a] Reaction conditions: cyclohexene, 0.5 mL; oxygen pressure, 4 MPa; deionized water, 2.0 mL; catalyst, 0.023 g; reaction time, 5 h; reaction temperature, 90°C.

---

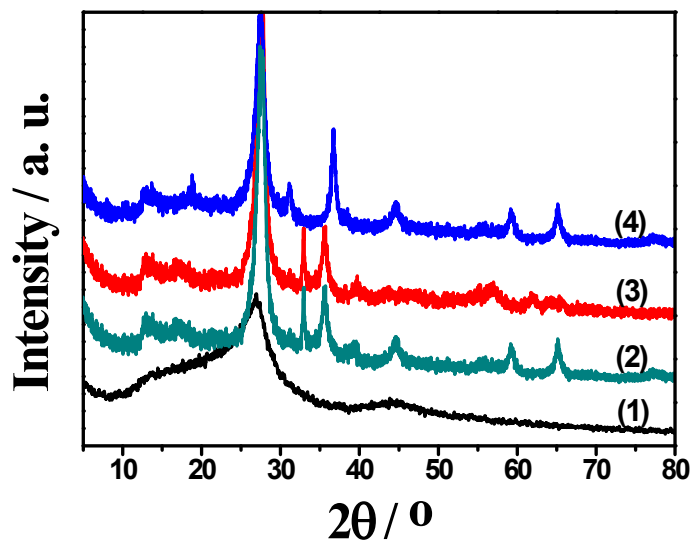

**Figure S1.** XRD patterns of 5-Fe-Co-g-C<sub>3</sub>N<sub>4</sub> (1), Fe-Co/g-C<sub>3</sub>N<sub>4</sub> (2), Fe/g-C<sub>3</sub>N<sub>4</sub> (3), Co/g-C<sub>3</sub>N<sub>4</sub> (4). It is can be seen that XRD pattern of 5-Fe-Co-g-C<sub>3</sub>N<sub>4</sub> is obviously different from that of Fe-Co/g-C<sub>3</sub>N<sub>4</sub>, Fe/g-C<sub>3</sub>N<sub>4</sub> or Co/g-C<sub>3</sub>N<sub>4</sub>. There were no peaks originating from Fe or Co species in 5-Fe-Co-g-C<sub>3</sub>N<sub>4</sub> sample, due to the formation of Fe-N or Co-N bonds through the chemical coordination of Fe or Co species with g-C<sub>3</sub>N<sub>4</sub>. However, the diffraction peak for Fe or Co was clearly observed in Fe-Co/g-C<sub>3</sub>N<sub>4</sub>, Fe/g-C<sub>3</sub>N<sub>4</sub> or Co/g-C<sub>3</sub>N<sub>4</sub> sample, and Fe or Co species mainly existed in the form of Fe<sub>3</sub>O<sub>4</sub> and Co<sub>3</sub>O<sub>4</sub>.

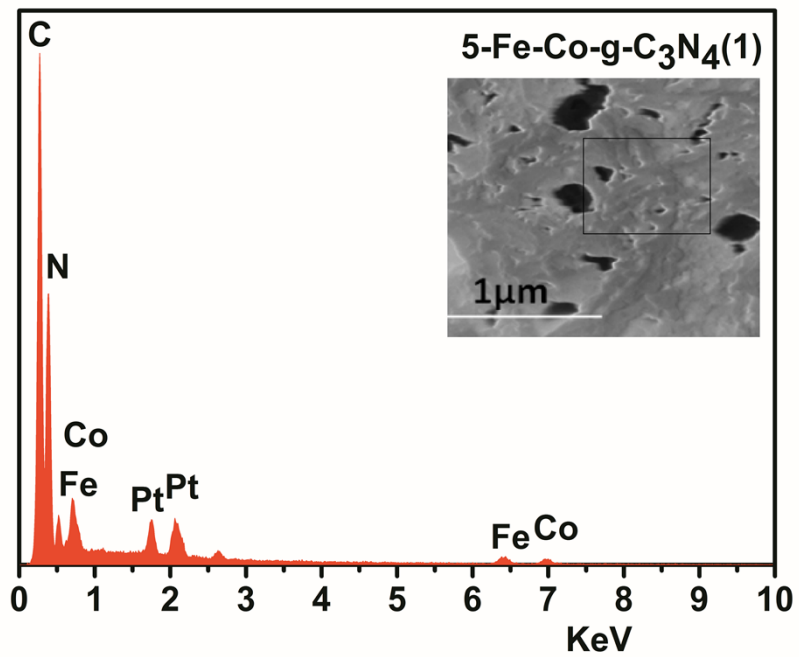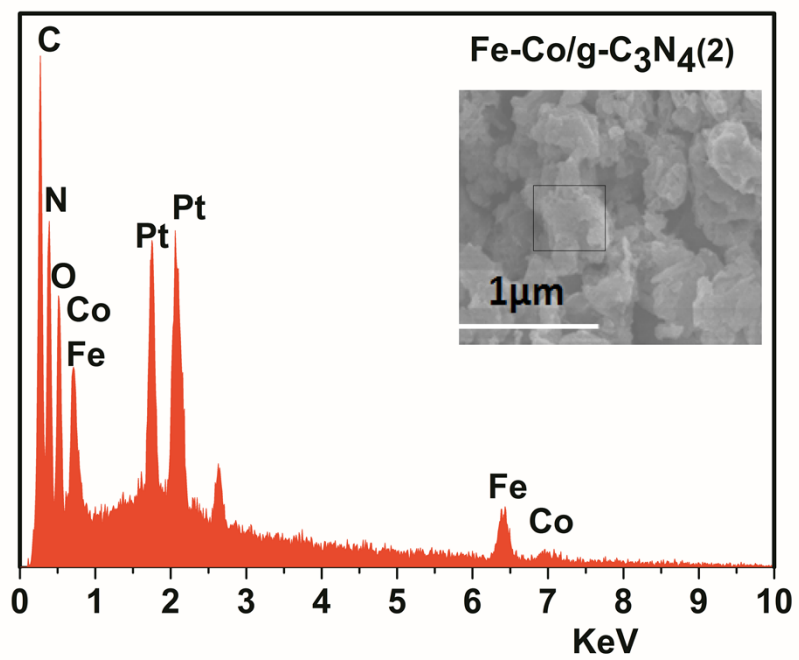

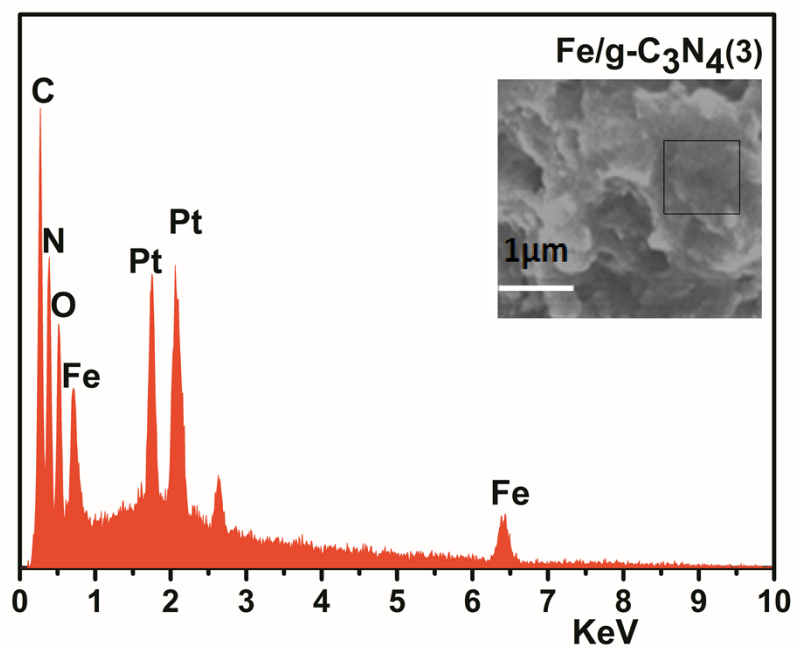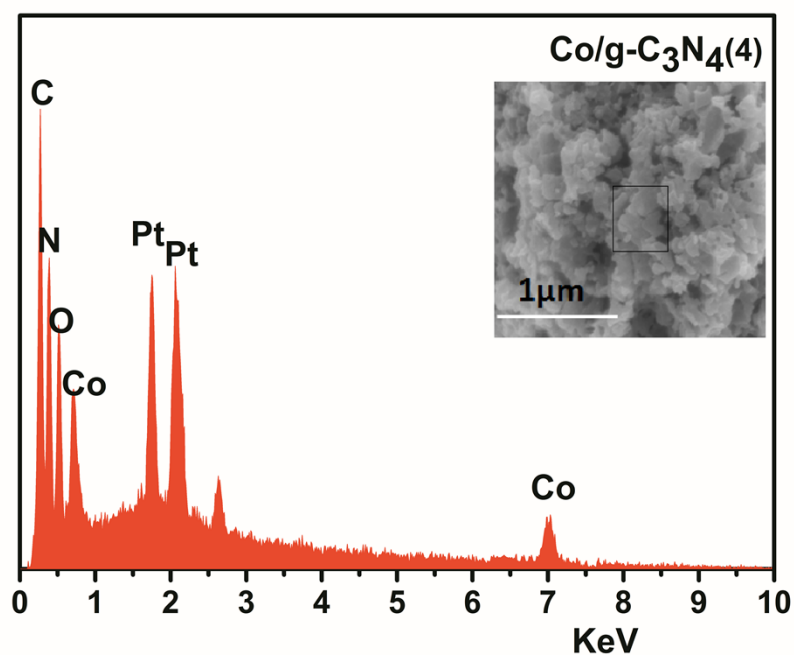

**Figure S2.** Energy dispersive X-ray (EDX) spectra and SEM images (Inset) of 5-Fe-Co-g-C<sub>3</sub>N<sub>4</sub> (1), Fe-Co/g-C<sub>3</sub>N<sub>4</sub> (2), Fe/g-C<sub>3</sub>N<sub>4</sub> (3), Co/g-C<sub>3</sub>N<sub>4</sub> (4). It shows the presence of C, N, O, Fe and Co in Fe-Co/g-C<sub>3</sub>N<sub>4</sub>, Fe/g-C<sub>3</sub>N<sub>4</sub> or Co/g-C<sub>3</sub>N<sub>4</sub> samples. However, only the small amount of O was found in 5-Fe-Co-g-C<sub>3</sub>N<sub>4</sub> sample. Pt

element comes from sample spraying for better conductivity so that the better SEM images can be obtained.

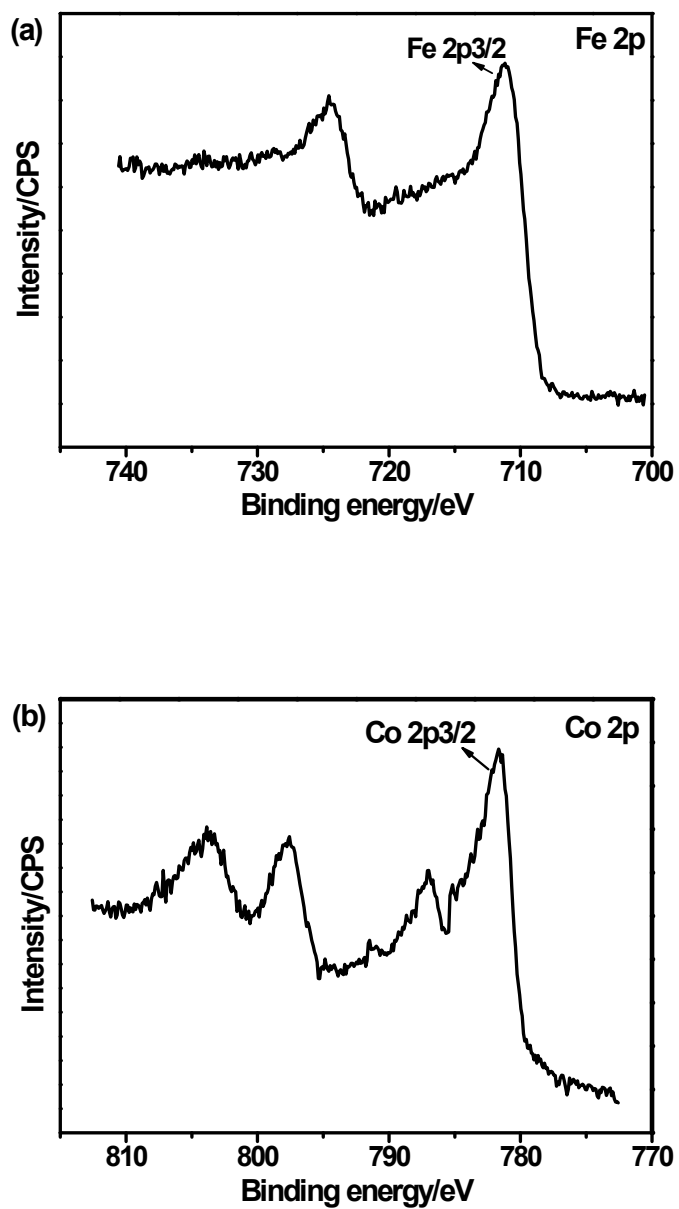

**Figure S3.** XPS spectra of Fe2p (a), and Co2p (b) in the Fe-Co/g-C<sub>3</sub>N<sub>4</sub>.
